# Supplementary material for: Optical and relaxometric properties of monometallic (EuIII, TbIII, GdIII) and heterobimetallic (ReI/GdIII) systems based on a functionalized bipyridine-containing acyclic ligand
Source: Royal Society of Chemistry journal article supplement (doi:10.1039/c6dt00405a), 2016-01-01
Supplement: c6dt00405a1.pdf [file c6dt00405a1.pdf]

**Supporting Information for :**

**Optical and relaxometric properties  
of monometallic (Eu<sup>III</sup>, Tb<sup>III</sup>, Gd<sup>III</sup>) and heterobimetallic (Re<sup>I</sup>/Gd<sup>III</sup>) systems  
based on a functionalized bipyridine-containing acyclic ligand**

Nadine Leygue,<sup>a,b</sup> Alexandre Boulay,<sup>a,b</sup> Chantal Galaup,<sup>a,b</sup> Eric Benoist,<sup>a,b</sup> Sophie Laurent,<sup>c,d</sup>  
Luce Vander Elst,<sup>\*c,d</sup> Béatrice Mestre-Voegtlé,<sup>\*‡a,b</sup> and Claude Picard<sup>\*a,b</sup>

<sup>a</sup>CNRS; Laboratoire de Synthèse et Physico-Chimie de Molécules d'Intérêt Biologique,  
SPCMIB, UMR-5068; 118 Route de Narbonne, F-31062 Toulouse cedex 9, France.

<sup>b</sup>Université de Toulouse; UPS, Laboratoire de Synthèse et Physico-Chimie de Molécules  
d'Intérêt Biologique, SPCMIB; 118 route de Narbonne, F-31062 Toulouse cedex 9, France.

<sup>c</sup>NMR and Molecular Imaging Laboratory, Department of General, Organic and Biomedical  
Chemistry, University of Mons, 23 Place du Parc, B-7000 Mons, Belgium.

<sup>d</sup>Center for Microscopy and Molecular Imaging (CMMI), Rue Adrienne Bolland, 8, B-6041  
Gosselies, Belgium

<sup>‡</sup>Present Address: CNRS, Laboratoire de Chimie de coordination (LCC), UPR 8241, 205  
route de Narbonne, 31077 Toulouse cedex 4, France.

E-mail : luce.vanderelst@umons.ac.be (LVE), beatrice.mestre@lcc-toulouse.fr (BMV),  
picard@chimie.ups-tlse.fr (CP).

| Table of contents                                                                                                                                                                                                                                                                                                                                                                                           | Page |
|-------------------------------------------------------------------------------------------------------------------------------------------------------------------------------------------------------------------------------------------------------------------------------------------------------------------------------------------------------------------------------------------------------------|------|
| <b>Figure S1:</b> $^1\text{H}$ and J MOD $^{13}\text{C}$ NMR (300 and 75 MHz respectively; DMSO- $d_6$ ) spectra of compound <b>2</b> ( $\text{H}_5\text{BPMNTA}$ ).                                                                                                                                                                                                                                        | S3   |
| <b>Figure S2:</b> $^1\text{H}$ and J MOD $^{13}\text{C}$ NMR (300 and 75 MHz respectively; $\text{CDCl}_3$ ) spectra of compound <b>5</b> .                                                                                                                                                                                                                                                                 | S4   |
| <b>Figure S3:</b> $^1\text{H}$ NMR (300 MHz; $\text{CDCl}_3$ ) spectra of compounds <b>9</b> and <b>10</b> .                                                                                                                                                                                                                                                                                                | S5   |
| <b>Figure S4:</b> $^1\text{H}$ and J MOD $^{13}\text{C}$ NMR (300 and 125 MHz respectively; $\text{CDCl}_3$ ) spectra of compound <b>11</b> .                                                                                                                                                                                                                                                               | S6   |
| <b>Figure S5:</b> $^1\text{H}$ NMR (400 MHz; $\text{D}_2\text{O}$ ) and $\text{ES}^+$ /HRMS spectra of compound <b>12</b> .                                                                                                                                                                                                                                                                                 | S7   |
| <b>Figure S6:</b> HPLC-UV chromatogram and $\text{ES}^+$ /HRMS spectrum of Gd-BPMNTA complex (HPLC conditions are provided in the experimental part).                                                                                                                                                                                                                                                       | S8   |
| <b>Figure S7:</b> UPLC-UV chromatogram and $\text{ES}^+$ /HRMS spectrum of dinuclear Re/Gd complex <b>13</b> (UPLC conditions are provided in the experimental part).                                                                                                                                                                                                                                       | S9   |
| <b>Figure S8:</b> Plot of emission intensity of the $^5\text{D}_0 \rightarrow ^7\text{F}_2$ transition (617 nm) vs. time after mixing BPMNTA chelator (1 $\mu\text{M}$ ) and $\text{EuCl}_3$ (1 equiv.) in Tris buffer (pH 7.4) at room temperature.                                                                                                                                                        | S10  |
| <b>Figure S9:</b> Plot of emission intensity of the $^5\text{D}_0 \rightarrow ^7\text{F}_2$ transition (617 nm) of Eu-BPMNTA complex (1 $\mu\text{M}$ ) vs. time in the presence of 1000 molar equivalents of EDTA in Tris buffer (pH 7.4).                                                                                                                                                                 | S10  |
| <b>Figure S10:</b> Infrared spectrum of Re complex <b>9</b> .                                                                                                                                                                                                                                                                                                                                               | S11  |
| <b>Figure S11:</b> Infrared spectrum of dinuclear Re/Gd complex <b>13</b> .                                                                                                                                                                                                                                                                                                                                 | S11  |
| <b>Figure S12:</b> Absorption (left) and emission (right) spectra of compound <b>9</b> in $\text{CH}_3\text{CN}$ .                                                                                                                                                                                                                                                                                          | S12  |
| <b>Figure S13:</b> Absorption (left) and emission (right) spectra of compound <b>10</b> in $\text{CH}_3\text{CN}$ .                                                                                                                                                                                                                                                                                         | S12  |
| <b>Figure S14:</b> Plot of the paramagnetic relaxation rate, $R_1^{\text{p}}$ , of Gd-BPMNTA complex and dinuclear complex <b>13</b> in water at 310 K and 20 MHz vs. complex concentrations (0.5 – 3 mM). $R_1^{\text{p}} = R_1^{\text{obs}} - R_1^{\text{dia}}$ where $R_1^{\text{obs}}$ is the observed relaxation rate and $R_1^{\text{dia}}$ is the relaxation rate in absence of paramagnetic center. | S13  |
| <b>Figure S15:</b> Temperature (278 – 318 K) dependence of the proton longitudinal relaxivity, $r_1$ , of Gd-BPMNTA complex and dinuclear complex <b>13</b> in water at 20 MHz.                                                                                                                                                                                                                             | S13  |
| <b>Table S1:</b> Parameters obtained from the theoretical fitting of the O-17 data of dinuclear Re/Gd complex <b>13</b> in water at 11.75 T.                                                                                                                                                                                                                                                                | S14  |
| <b>Table S2:</b> Relaxivity values at 20 and 60 MHz ( $T = 310$ K) and parameters obtained from the theoretical fitting of the proton NMRD data in water at 310 K of dinuclear Re/Gd complex <b>13</b> .                                                                                                                                                                                                    | S14  |



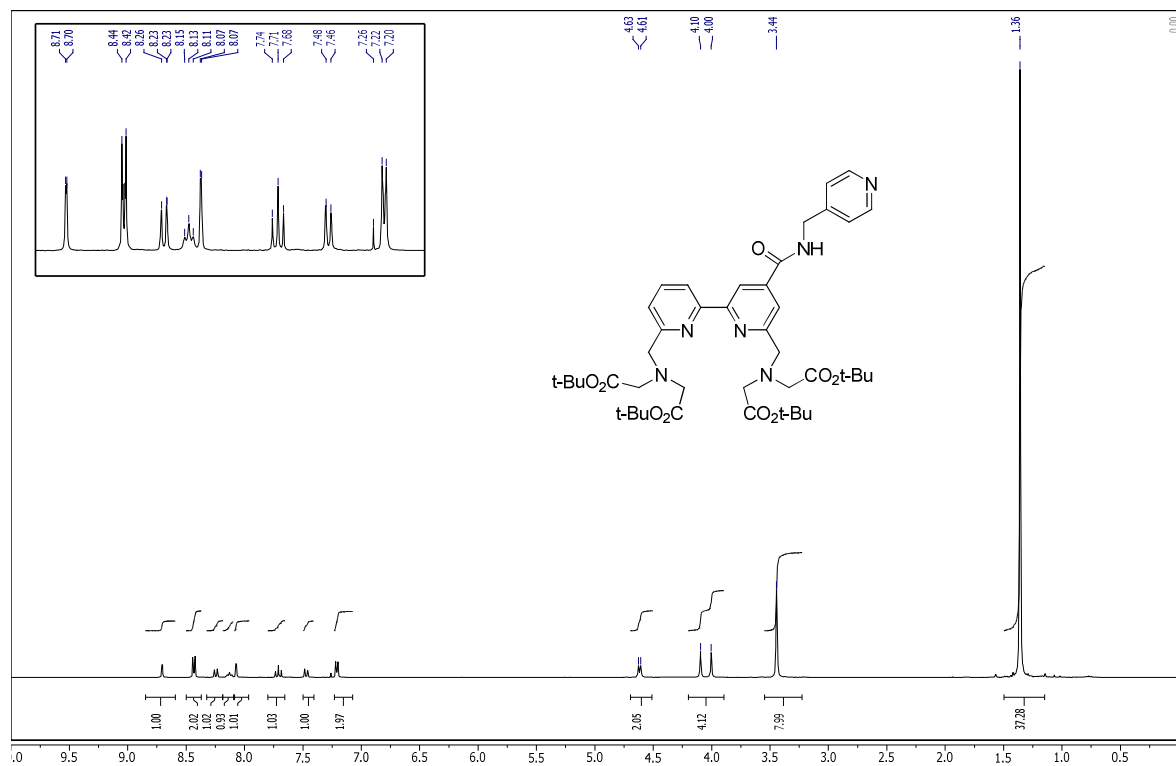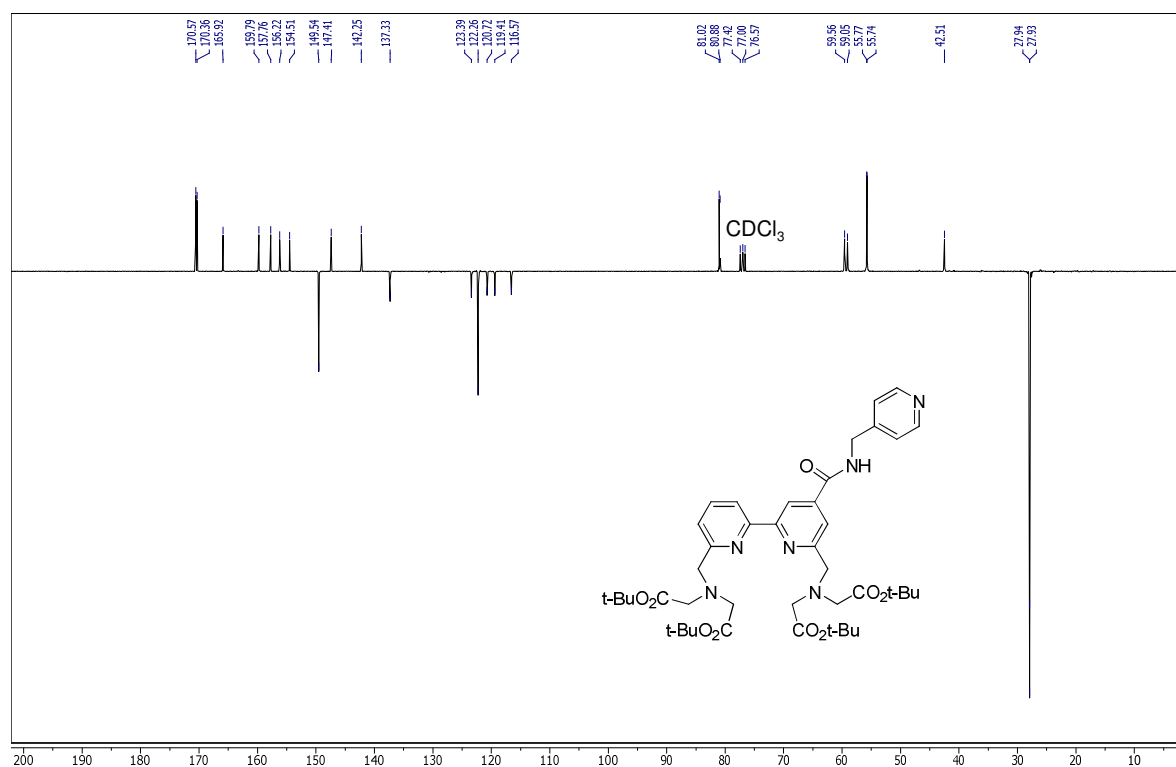

**Figure S2:** <sup>1</sup>H and J MOD <sup>13</sup>C NMR (300 and 75 MHz respectively; CDCl<sub>3</sub>) spectra of compound 5.

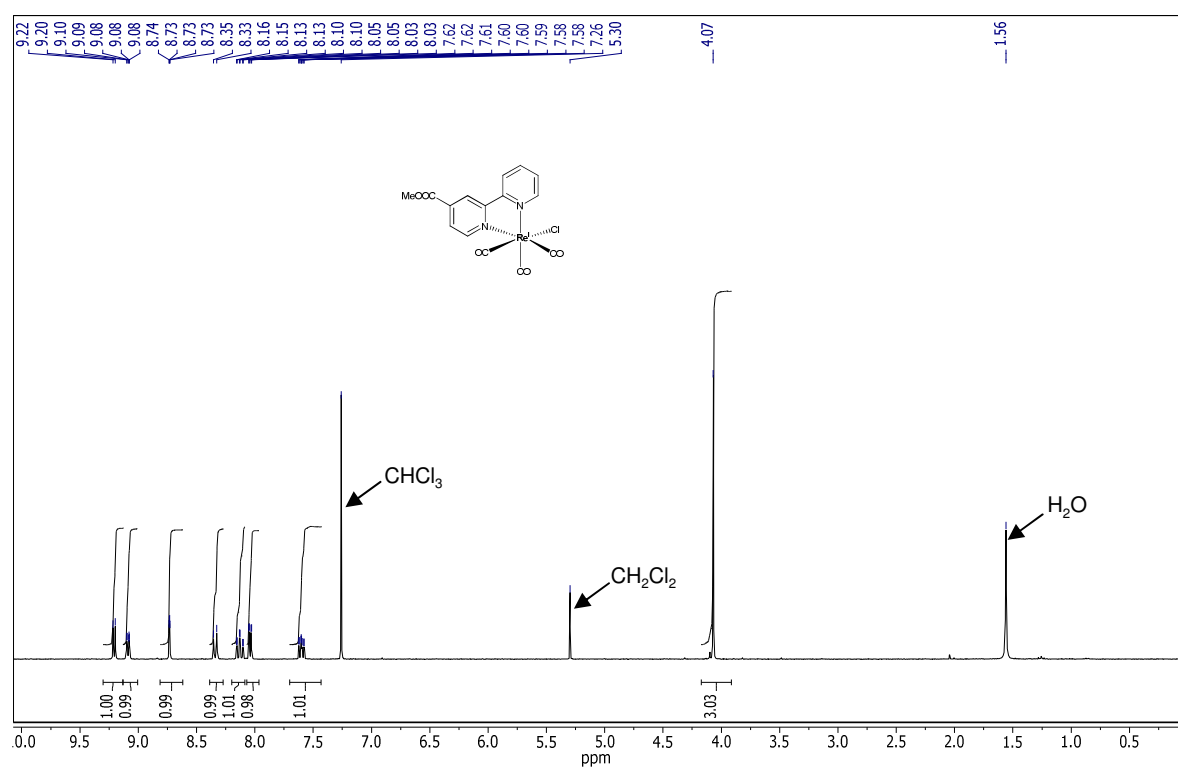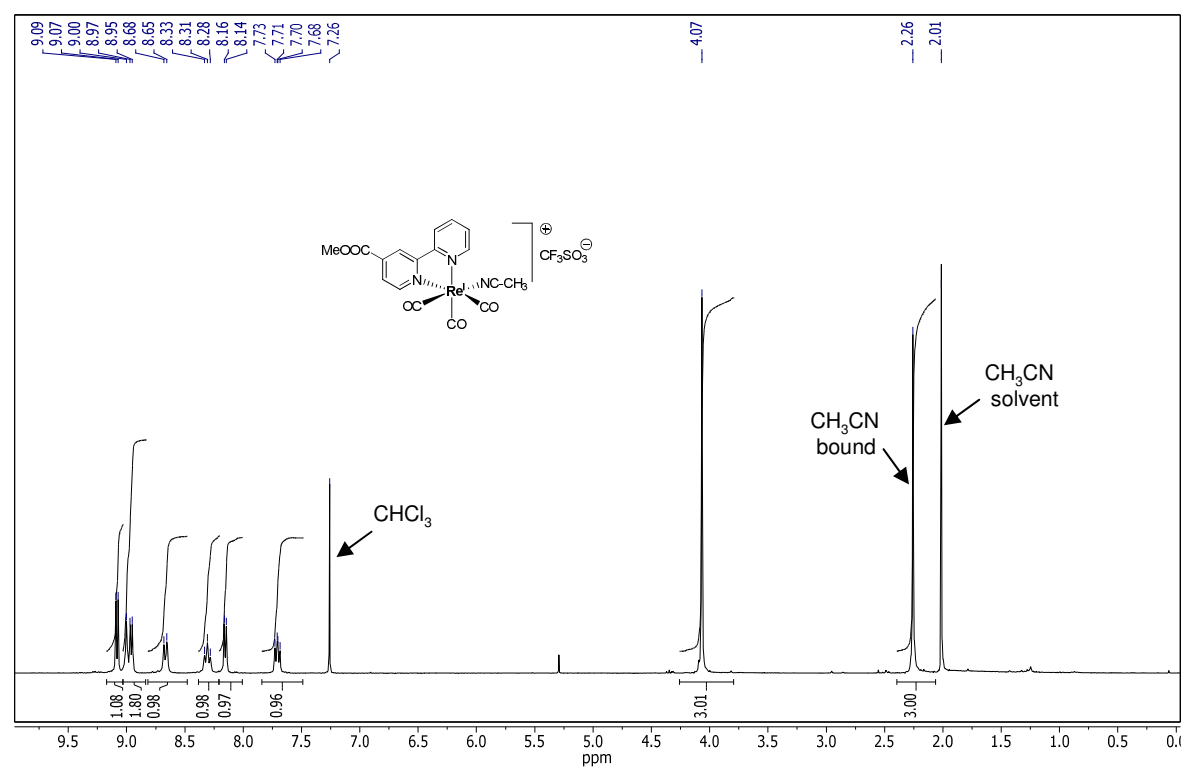

**Figure S3:** <sup>1</sup>H NMR (300 MHz, CDCl<sub>3</sub>) spectra of compounds **9** and **10**.

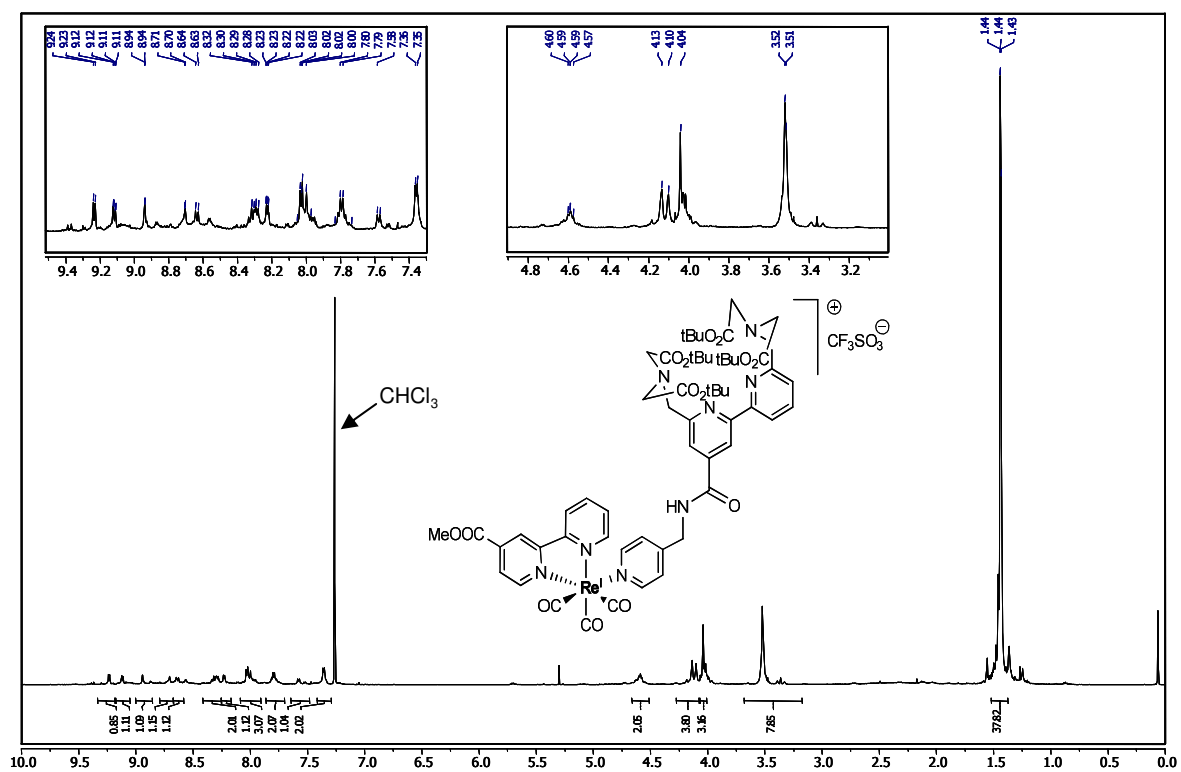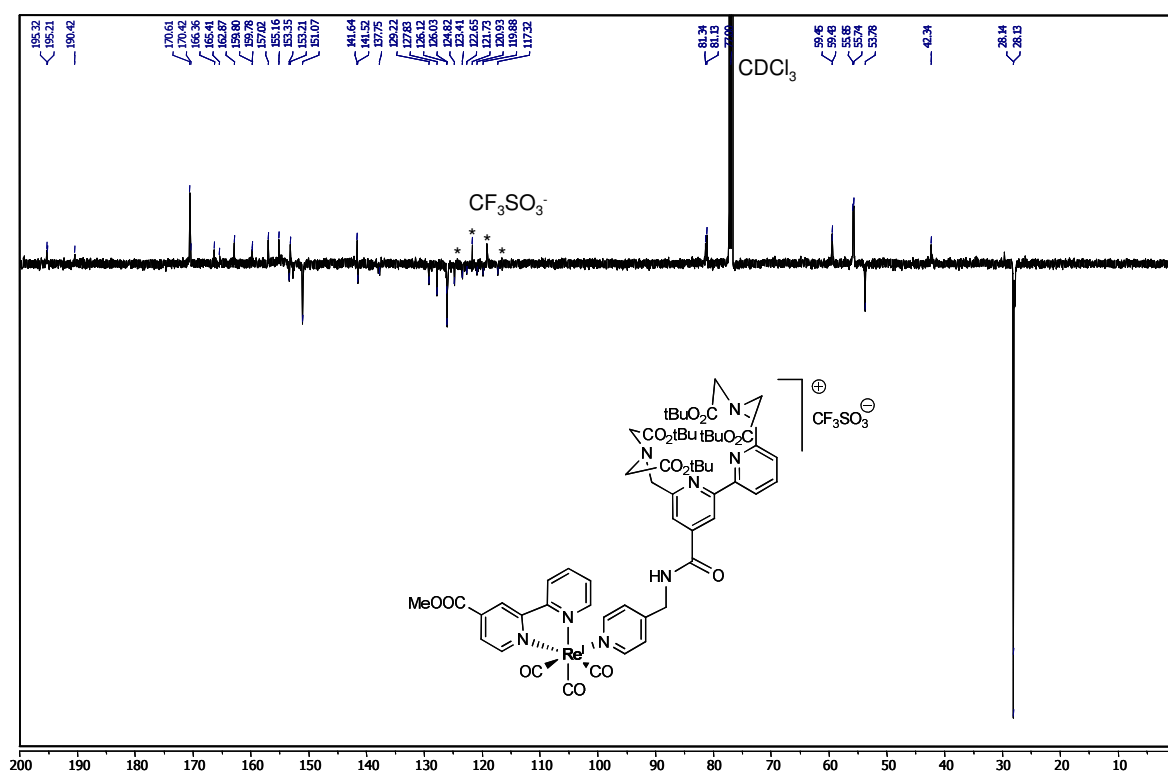

**Figure S4:** <sup>1</sup>H and J MOD <sup>13</sup>C NMR (300 and 125 MHz respectively; CDCl<sub>3</sub>) spectra of compound 11.

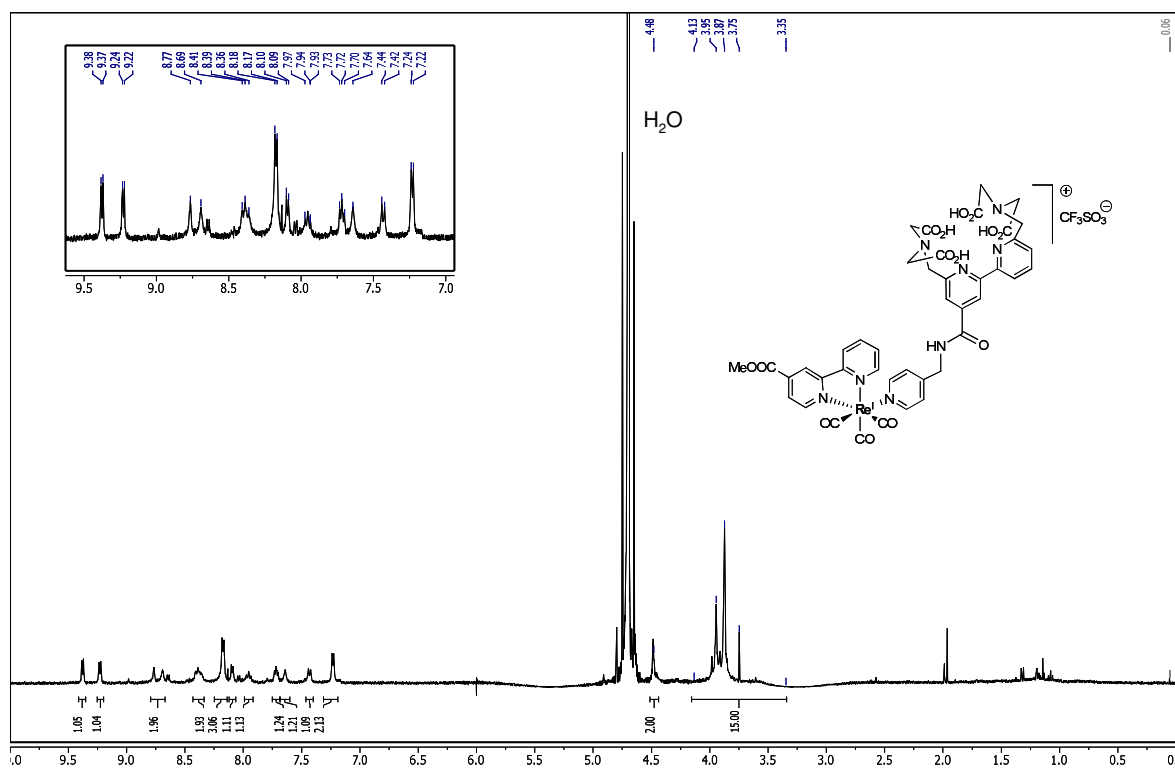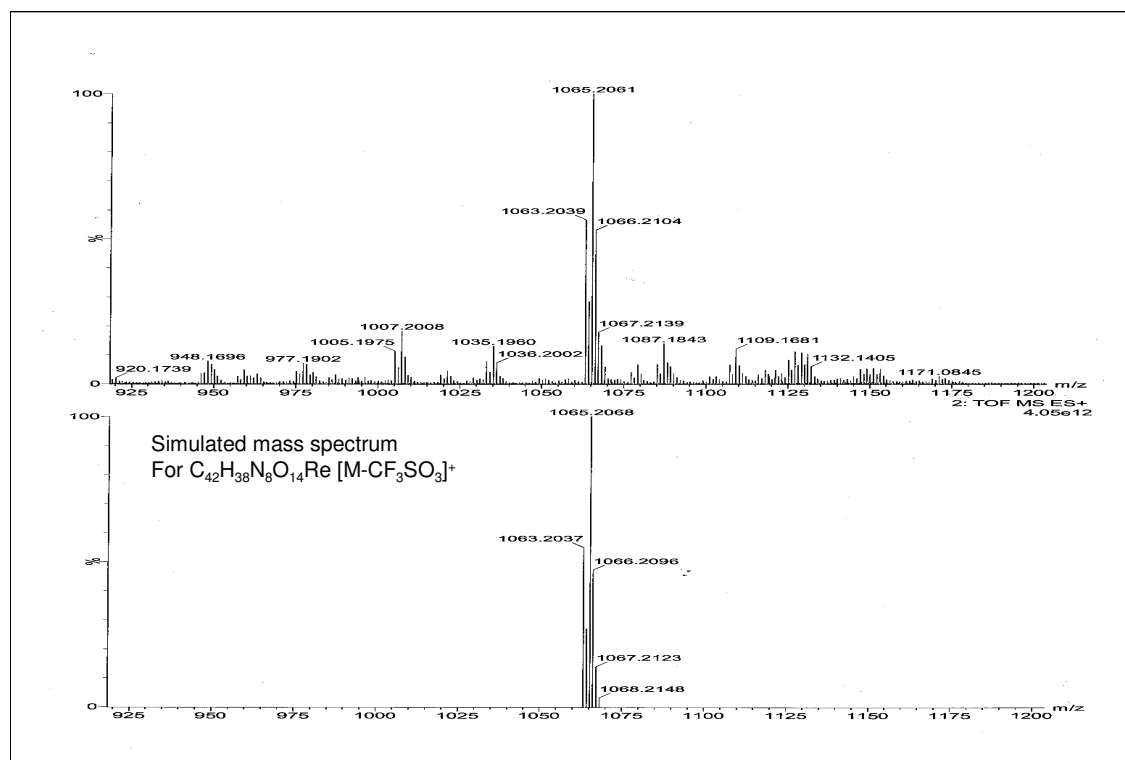

**Figure S5:**  $^1\text{H}$  NMR (400 MHz,  $\text{D}_2\text{O}$ ) and ES<sup>+</sup>/HRMS spectra of compound **12**.

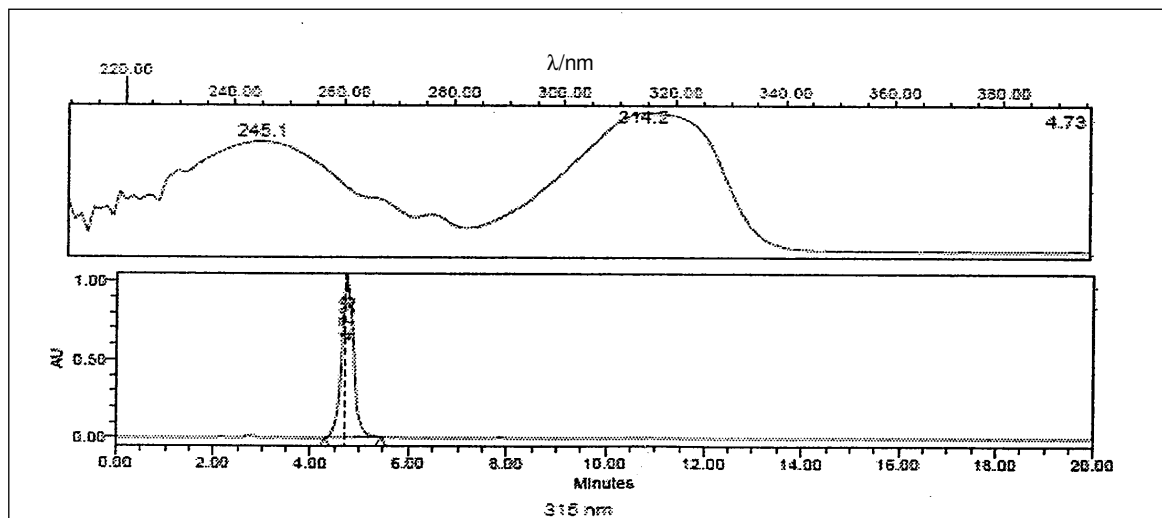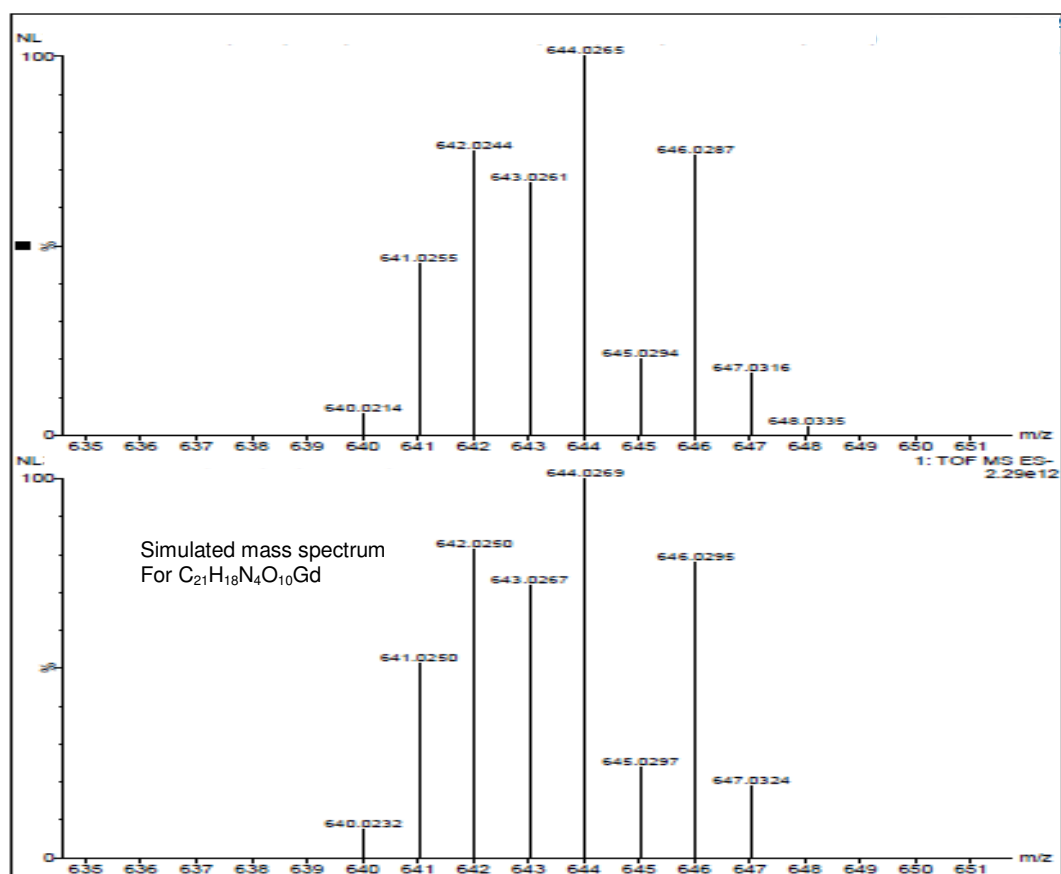

**Figure S6:** HPLC-UV chromatogram and ES<sup>+</sup>/HRMS spectrum of Gd-BPMNTA complex (HPLC conditions are provided in the experimental part).



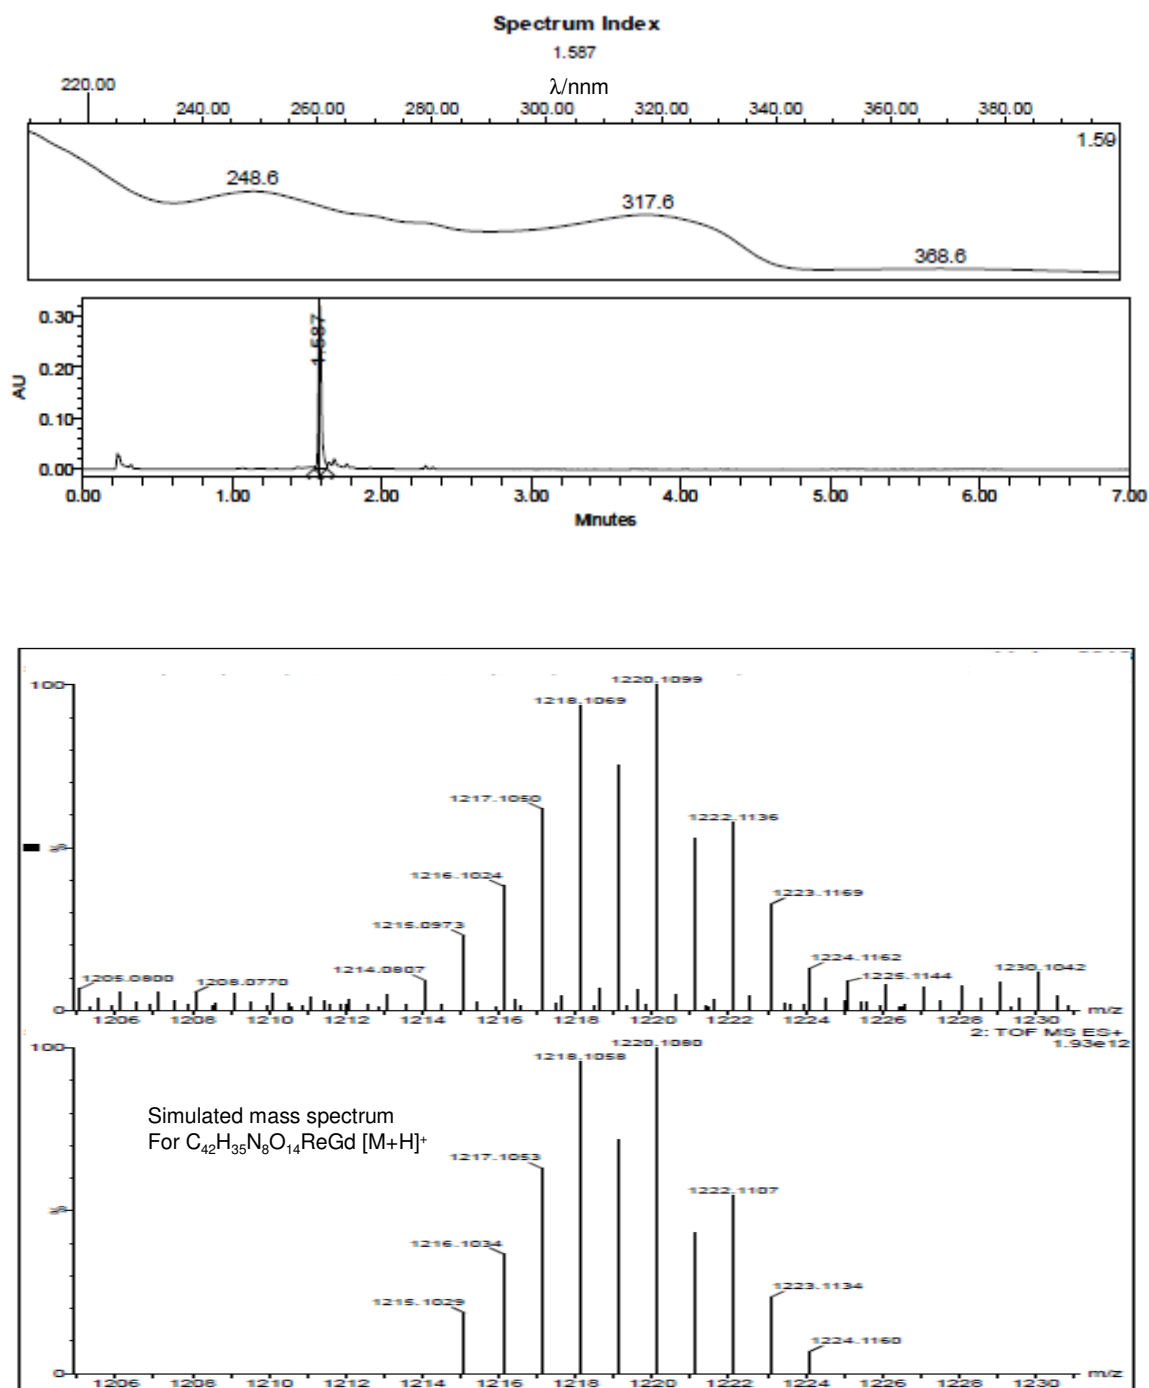

**Figure S7:** UPLC-UV chromatogram and ES<sup>+</sup>/HRMS spectrum of dinuclear Re/Gd complex **13** (UPLC conditions are provided in the experimental part).

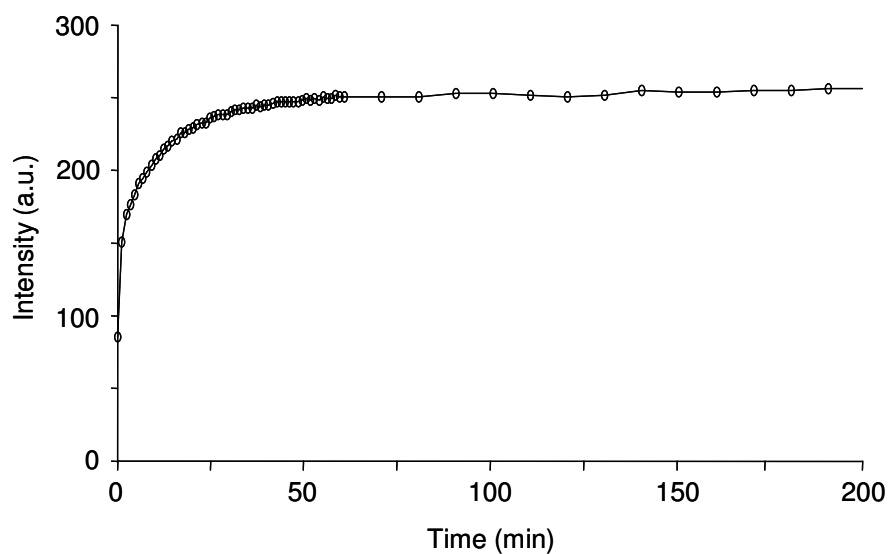

**Figure S8:** Plot of emission intensity of the  ${}^5D_0 \rightarrow {}^7F_2$  transition (617 nm) vs. time after mixing BPMNTA chelator (1  $\mu\text{M}$ ) and  $\text{EuCl}_3$  (1 equiv.) in Tris buffer (pH 7.4) at room temperature.

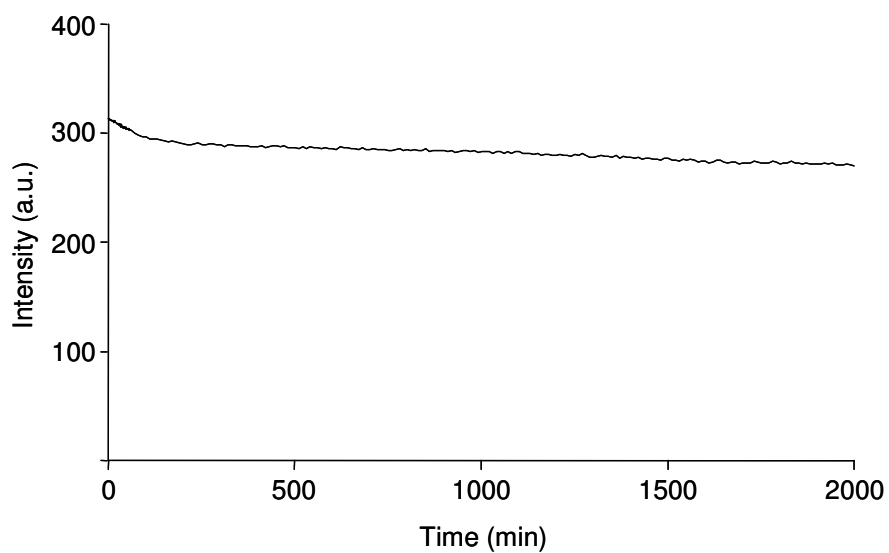

**Figure S9:** Plot of emission intensity of the  ${}^5D_0 \rightarrow {}^7F_2$  transition (617 nm) of Eu-BPMNTA complex (1  $\mu\text{M}$ ) vs. time in the presence of 1000 molar equivalents of EDTA in Tris buffer (pH 7.4).

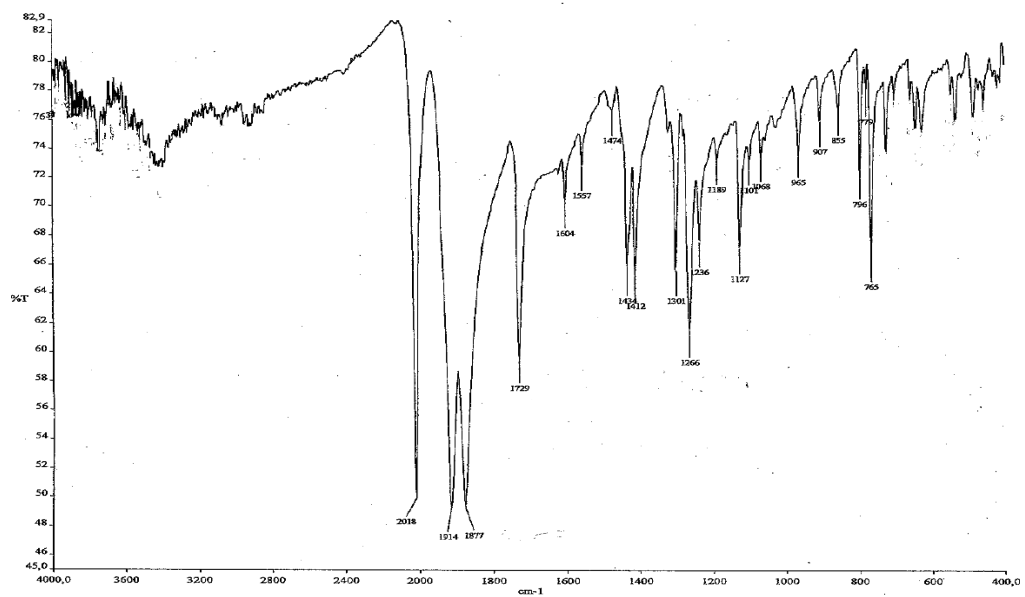

**Figure S10:** Infrared spectrum of Re complex **9**.

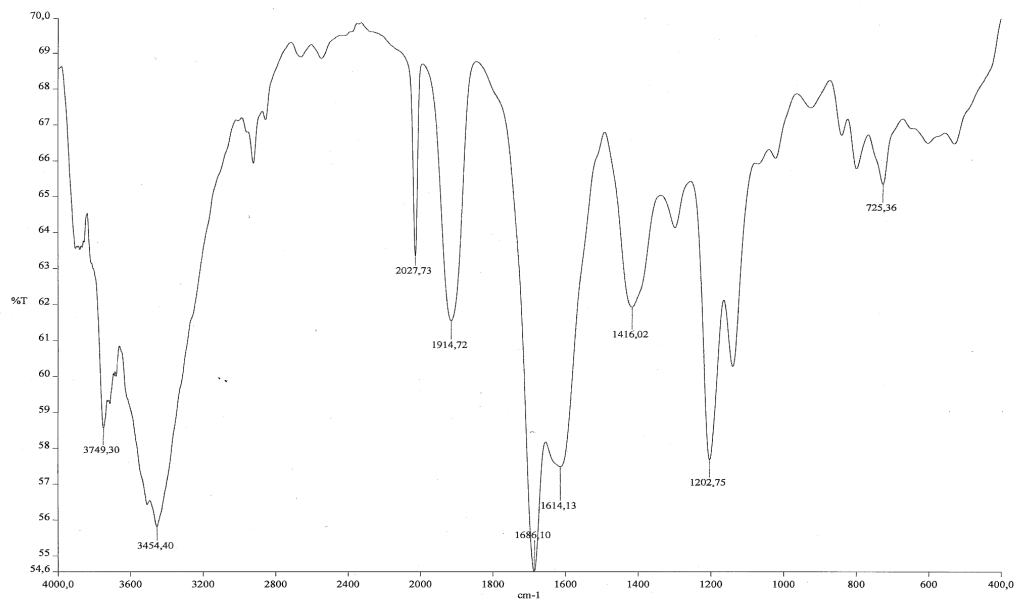

**Figure S11:** Infrared spectrum of dinuclear Re/Gd complex **13**.

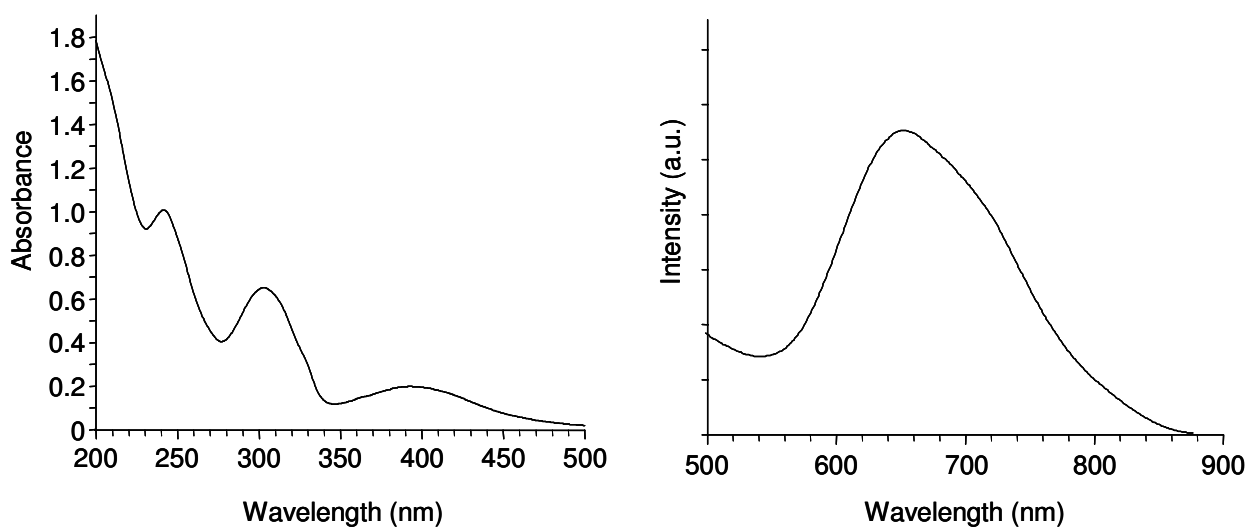

**Figure S12:** Absorption (left) and emission (right) spectra of compound **9** in CH<sub>3</sub>CN.

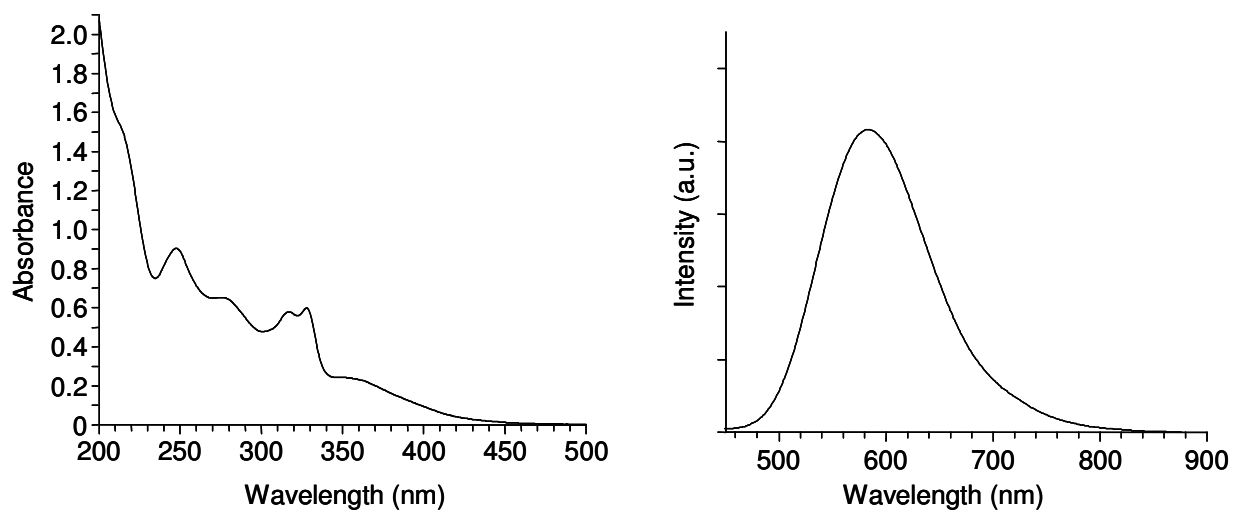

**Figure S13:** Absorption (left) and emission (right) spectra of compound **10** in CH<sub>3</sub>CN.

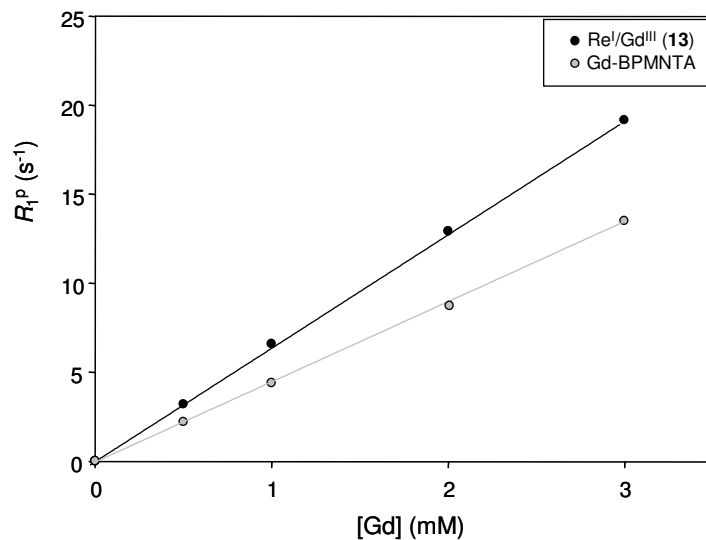

**Figure S14:** Plot of the paramagnetic relaxation rate,  $R_1^p$ , of Gd-BPMNTA complex and dinuclear complex **13** in water at 310 K and 20 MHz vs. complex concentrations (0.5 – 3 mM).  $R_1^p = R_1^{\text{obs}} - R_1^{\text{dia}}$  where  $R_1^{\text{obs}}$  is the observed relaxation rate and  $R_1^{\text{dia}}$  is the relaxation rate in absence of paramagnetic center.

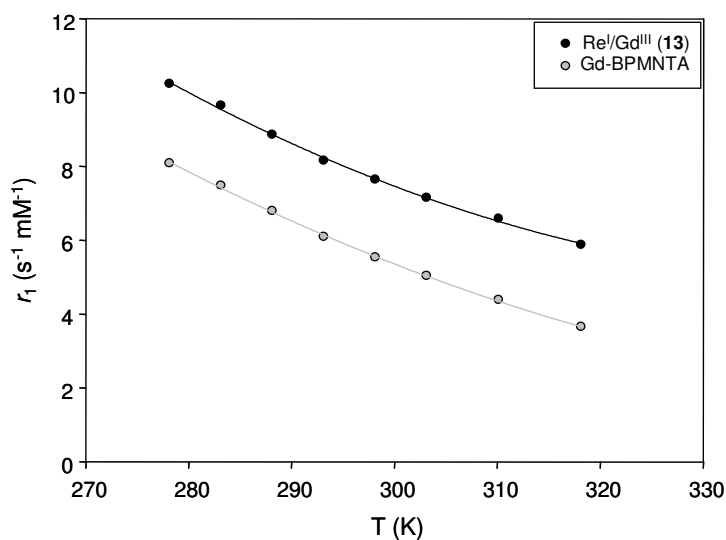

**Figure S15:** Temperature (278 – 318 K) dependence of the proton longitudinal relaxivity,  $r_1$ , of Gd-BPMNTA complex and dinuclear complex **13** in water at 20 MHz.

| parameter                                                  | value           |
|------------------------------------------------------------|-----------------|
| $\tau_M^{310K}$ [ns]                                       | $9.0 \pm 3.0$   |
| $\Delta H^\ddagger$ [kJ mol <sup>-1</sup> ]                | $55.5 \pm 0.7$  |
| $\Delta S^\ddagger$ [J mol <sup>-1</sup> K <sup>-1</sup> ] | $87.9 \pm 0.6$  |
| $A/\hbar$ [10 <sup>6</sup> rad s <sup>-1</sup> ]           | $-3.9 \pm 0.3$  |
| $B$ [10 <sup>20</sup> s <sup>-2</sup> ]                    | $4.71 \pm 0.85$ |
| $\tau_v^{298K}$ [ps]                                       | $1.35 \pm 0.3$  |
| $E_v$ [kJ mol <sup>-1</sup> ]                              | $4.95 \pm 3.5$  |

**Table S1:** Parameters obtained from the theoretical fitting of the O-17 data of dinuclear Re/Gd complex **13** in water at 11.75 T.

| parameter                                           | value          |
|-----------------------------------------------------|----------------|
| $\tau_M^{310K}$ [ns]                                | 9              |
| $\tau_R^{310K}$ [ps]                                | $138 \pm 3.3$  |
| $\tau_{SO}^{310K}$ [ps]                             | $87.6 \pm 1.4$ |
| $\tau_v^{310K}$ [ps]                                | $25.6 \pm 1.5$ |
| $r_1$ (mM <sup>-1</sup> s <sup>-1</sup> ) at 20 MHz | 6.6            |
| $r_1$ (mM <sup>-1</sup> s <sup>-1</sup> ) at 60 MHz | 6.0            |

**Table S2:** Relaxivity values at 20 and 60 MHz (T = 310 K) and parameters obtained from the theoretical fitting of the proton NMRD data in water at 310 K of dinuclear Re/Gd complex **13**. In the fitting procedure using the IS and OS model, some parameters were fixed:  $q = 1$ ,  $\tau_M = 9$  ns,  $r_{GdH} = 0.31$  nm,  $d = 0.36$  nm and  $D = 2.93 \times 10^{-9}$  m<sup>2</sup> s<sup>-1</sup>.
